# Evidence of a cellulosic layer in Pandoravirus tegument and the mystery of the genetic support of its biosynthesis

1 **Running title:** the cellulosic tegument of Pandoravirus

2 **Author list:** Djamal BRAHIM BELHAOUARI<sup>1</sup>, Jean-Pierre BAUDOIN<sup>1</sup>, Franck

3 GNANKOU<sup>1</sup>, Fabrizio DI PINTO<sup>1</sup>, Philippe COLSON<sup>1,2</sup>, Sarah AHERFI<sup>1,2\*</sup>, Bernard LA

4 SCOLA<sup>1,2\*</sup>

5 <sup>1</sup> Aix-Marseille Univ., Institut de Recherche pour le Développement (IRD), Assistance Publique -  
6 Hôpitaux de Marseille (AP-HM), MEPHI, 27 boulevard Jean Moulin, 13005 Marseille, France

7 <sup>2</sup> IHU Méditerranée Infection, 19-21 boulevard Jean Moulin, 13005 Marseille, France

8

9 \* Correspondence: [sarah.aherfi@ap-hm.fr](mailto:sarah.aherfi@ap-hm.fr) and [bernard.la-scola@univ-amu.fr](mailto:bernard.la-scola@univ-amu.fr)

10

11 **Abstract**

12 Pandoraviruses are giant viruses of amoebae with 1  $\mu\text{m}$ -long virions. They have an ovoid  
13 morphology and are surrounded by a tegument-like structure lacking any capsid protein nor any gene  
14 encoding a capsid protein. In this work, we studied the ultrastructure of the tegument surrounding  
15 Pandoravirus massiliensis virions and noticed that this tegument is composed of a peripheral sugar  
16 layer, an electron-dense membrane, and a thick electron-dense layer consisting in several tubules  
17 arranged in a helicoidal structure resembling that of cellulose. Pandoravirus massiliensis particles  
18 were stained by Calcofluor white, a fluorescent dye of cellulose, and the enzymatic treatment of  
19 particles by cellulase showed the degradation of the viral tegument. We first hypothesized that the  
20 cellulose tegument could be synthesized by enzymes encoded by Pandoravirus. Bioinformatic  
21 analyses revealed in Pandoravirus massiliensis, a candidate gene encoding a putative cellulose  
22 synthase, with a homology with the BcsA domain, one of the catalytic subunits of the bacterial  
23 cellulose synthase, but with a low level of homology. This gene was transcribed during the  
24 replicative cycle of Pandoravirus massiliensis, but several arguments run counter to this hypothesis.  
25 Indeed, even if this gene is present in other Pandoraviruses, the one of the strain studied is the only  
26 one to have this BcsA domain and no other enzymes involved in the synthesis of cellulose could be  
27 detected, although we cannot rule out that such genes could have been undetected among the large  
28 proportion of Orfans of Pandoraviruses. As an alternative, we investigated whether Pandoravirus  
29 could divert the cellulose synthesis machinery of the amoeba to its own account. Indeed, contrary to  
30 what is observed in the case of infections with other giant viruses such as mimivirus, it appears that  
31 the transcription of the amoeba, at least for the cellulose synthase gene, continues throughout the  
32 growth phase of envelopes of Pandoravirus. Finally, we believe that this scenario is more plausible. If  
33 confirmed, it could be a unique mechanism in the virosphere.

34 **Key words:** Giant virus, Pandoravirus, amoeba, *Acanthamoeba*, *Megavirales*, capsid, tegument

35 cellulose.

## 36 **Introduction**

37 Giant viruses of amoebae are a group of complex viruses phylogenetically closely relative to  
38 the Nucleo – Cytoplasmic Large DNA Viruses (NCLDVs), within a new proposed order named  
39 Megavirales (Colson et al., 2013). Since the discovery of the first giant virus of amoebae in 2003 (La  
40 Scola et al., 2003), dozens of new giant viruses were described, considerably expanding our  
41 knowledge about their diversity, structure, genomics and evolution.

42 In 2013, two new complex giant viruses, named pandoraviruses, were described (Philippe et  
43 al., 2013). They replicate in *Acanthamoeba castellanii* and compose a new phylogenetic group of  
44 giant viruses of amoebae related to phycodnaviruses. The first isolate, named Pandoravirus salinus,  
45 originated from a marine sediment layer of the Tunquen River in Chile. The second isolate,  
46 Pandoravirus dulcis, was isolated from the mud of a freshwater pond in Australia. Pandoraviruses  
47 harbor specific morphological and genetic features, including ovoid-shaped particles with an ostiole-  
48 like apex and measuring ~1.0 µm in length and ~0.5µm in diameter, classifying them as the second  
49 largest particles after those of Pithovirus sibericum (Legendre et al., 2014). These viruses have a  
50 double-stranded DNA genome, up to 2.5 Mb (for Pandoravirus salinus), the largest genome ever  
51 described to date in the virosphere (Philippe et al., 2013). Subsequently, the nature of an  
52 endocytobiont of *Acanthamoeba* isolated few years before in Germany from the contact lens and  
53 storage case fluid of a patient with keratitis, was recognized as the third pandoravirus and was named  
54 Pandoravirus inopinatum (Scheid, 2016; Scheid et al., 2014). In 2015-2016, we isolated three new  
55 pandoravirus strains from sewage and soda lake water samples collected in Brazil, by co-culture on  
56 *A. castellanii*. These viruses were named respectively Pandoravirus massiliensis, Pandoravirus  
57 pampulha, and Pandoravirus braziliensis (Aherfi et al., 2018). Other recent prospecting studies  
58 reported the isolation of seven additional strains: Pandoravirus quercus, isolated from a soil sample

59 collected in Marseille (France); Pandoravirus neocaledonia, isolated from the brackish water of a  
60 mangrove near Noumea airport (New Caledonia), Pandoravirus macleodensis, isolated from a  
61 freshwater pond near Melbourne (Australia) (Legendre et al., 2018), Pandoravirus celtis, isolated  
62 from a soil sample collected in Marseille (Legendre et al., 2019) and 3 new pandoraviruses isolated  
63 from water samples in Brazil (Pereira Andrade et al., 2019).

64 Although other giant viruses with a similar ovoid morphology have been described, including  
65 pithoviruses, cedratviruses or Orpheovirus (Andreani et al., 2016, 2018; Legendre et al., 2014),  
66 pandoraviruses have the intriguing particularity to harbor no hints of a known capsid protein and, at  
67 the same time, the absence in virions of any structure similar to that of a known capsid (Aherfi et al.,  
68 2018; Legendre et al., 2018; Philippe et al., 2013; Scheid, 2016). In addition, no capsid-resembling  
69 protein was identified by proteomics in the Pandoravirus salinus and Pandoravirus massiliensis  
70 virions (Aherfi et al., 2018; Philippe et al., 2013). Pandoravirus virions are wrapped in a  $\approx 70$ -nm-  
71 thick tegument-like envelope, composed of three layers: one  $\approx 20$  nm-thick of light density; one  
72 intermediate of  $\approx 25$  nm-thick that appears darker and composed of fibrils; and an external layer  $\approx 25$   
73 nm-thick with a medium density (Philippe et al., 2013). At one of the particle apex, an aperture of  
74  $\approx 70$  nm in diameter opens the viral tegument. An internal lipid membrane is present beneath the  
75 tegument, thus delimiting the particle core. The tegument and the internal content of pandoravirus  
76 virions are synthesized simultaneously, from the aperture-harboring apex, during neo-virion synthesis  
77 in the cytoplasm of the amoebae. However, the nature of this tegument has remained unknown to  
78 date. Its deciphering is needed to refine the definition of these giant viruses.

79 In the present study, we aimed to characterize the nature of the tegument of pandoraviruses.

## 80 **Material and methods**

### 81 **Transmission electron microscopy, electron tomography and scanning electron microscopy**

82 For negative staining, a drop of purified Pandoravirus massiliensis particles fixed with 2.5%  
83 glutaraldehyde in 0.1M cacodylate buffer was adsorbed onto formvar carbon films on 400 mesh  
84 nickel grids (FCF400-Ni, EMS). Grids were stained for 10 seconds with 1% molybdate solution in  
85 filtered water at room temperature. For sections, pandoravirus particles were ultracentrifuged at  
86 8,000 g for 10 minutes and fixed for 1h at 4°C under gentle mixing after pellet resuspension in a  
87 mixture of 1.2 % glutaraldehyde / 0.05% ruthenium red in 0.1M cacodylate buffer. Virus particles  
88 were ultracentrifuged at 8,000 g for 10 minutes to discard supernatant and were then fixed for 3h at  
89 4°C in a mixture of 1.2 % glutaraldehyde / 0.05% ruthenium red in 0.1M cacodylate buffer. Then,  
90 Pandoravirus massiliensis virions were washed thrice 10 min with 0.1M Cacodylate buffer at 4°C.  
91 Next steps were performed at room temperature. Viral particles were rinsed twice for 15 min each,  
92 with a cacodylate 0.1 M / saccharose 0.2 M in water solution, and were dehydrated with ethanol  
93 50%, 70% and 96%, for 15, 30 and 30 min, respectively. Pandoravirus massiliensis virions were then  
94 placed for 1h in a mix of LR-White resin 100% (Ref. 17411, MUNC-500; Polysciences) and ethanol  
95 96% in a 2:1 ratio. After 30 min in pure 100% LR-White resin, particles were placed in 100% LR-  
96 White resin overnight at room temperature. Pandoravirus particles were then placed for 1h in 100%  
97 resin at room temperature. A total of 1.5 mL of Pure 100% LR-White resin was added on the virus  
98 pellet. Polymerization was achieved at 60°C for 3 days. Between all steps of inclusion, the samples  
99 were ultracentrifuged at 2,400 g and the supernatant was discarded. Sections of 70 or 300 nm-thick  
100 were cut on a UC7 ultramicrotome (Leica). Ultrathin sections were deposited on 300 mesh  
101 copper/rhodium grids (Maxtaform HR25, TAAB). They were post-stained with 5% uranyl acetate  
102 and lead citrate according to the Reynolds method (Reynolds, 1963). Gold nanoparticles with a  
103 diameter of 10 nm (Ref.752584; Sigma-Aldrich) were deposited on both faces on the 300 nm thick  
104 ultrathin sections for tomographic fiducial alignment. Electron micrographs were acquired on a  
105 Tecnai G<sup>2</sup> transmission electron microscope operated at 200 keV and equipped with a 4096 × 4096  
106 pixel resolution Eagle camera (FEI). Tomography tilt series were acquired with the Explore 3D (FEI)

107 software for tilt ranges of 110° with 1° increments. The mean applied defocus was - 4 µm. The  
108 magnification ranged between 9,600 and 29,000 with pixel sizes between 1.12 and 0.37 nm,  
109 respectively. The average thickness of the tomograms obtained was 155 ±43 nm (n= 8 measures).  
110 The tilt-series were aligned using ETomo from the IMOD software package (University of Colorado,  
111 USA) (Kremer et al., 1996) by cross-correlation. The tomograms were reconstructed using the  
112 weighted-back projection algorithm in ETomo from IMOD (Kremer et al., 1996). ImageJ software  
113 was used for image processing (Schneider et al., 2012).

#### 114 **Cellulose staining and light microscopy**

115 Calcofluor staining was achieved by depositing a drop of purified pandoravirus particles in PAS  
116 medium onto a glass slide and immediately adding 50µL of calcofluor white (Ref.18909; Sigma-  
117 Aldrich) and 50 µL of 10% KOH prior to glass slide covering and confocal imaging. Pandoravirus  
118 particles were imaged with a Plan-Aprochromat x63/1.4 immersion objective on a AiryScan LSM800  
119 confocal laser scanning microscope (Zeiss). Image size was 512x512 pixels and scan zoom ranged  
120 from x0.5 to x2.9. Laser excitation with a 405 nm wavelength was used for calcofluor staining  
121 imaging and was coupled to an ESID detector for depicting particles contours.

#### 122 **Enzymatic treatment of Pandoravirus massiliensis virions**

123 A total of 50 µL of purified virions was added to 1 mL of cellulase solution (cellulase from  
124 *Trichoderma reesei*, aqueous, Sigma Aldrich, C2730-50ML) at different concentrations and incubated  
125 for 48 h at 45°C. In a second time, these samples were imaged on AiryScan LSM800 microscope  
126 confocal laser scanning microscope. The effects were then observed by confocal microscopy  
127 (AiryScan LSM800), scanning microscopy and transmission electronic microscopy. The number of  
128 intact viral particles was estimated using the imageJ software (Schneider et al., 2012)

129 **Bioinformatic analyses to search for cellulose synthase candidate genes in the Pandoravirus**  
130 **massiliensis genome**

131 Sequences of the predicted ORFs of Pandoravirus massiliensis in amino acids were used for BLAST  
132 searches against the NCBI GenBank nr database. The analyses were performed using 1e-2, 25% and  
133 50% as thresholds for the evalue, the homology and the coverage of aligned sequences, respectively.  
134 Phylogenetic reconstruction was performed using the Maximum Likelihood method with the  
135 MEGA6 software (Tamura et al., 2013). Conserved domains were also searched for by DELTA-  
136 BLAST analyses against the Conserved Domain Database (Marchler-Bauer et al., 2017).

137 BLASTp, tBLASTn and BLASTn analyses were also performed against the gene contents and  
138 complete genomes of the 9 other pandoraviruses, i.e. Pandoravirus dulcis, Pandoravirus salinus  
139 (Philippe et al., 2013), Pandoravirus inopinatum (Scheid, 2016; Scheid et al., 2014), Pandoravirus  
140 quercus (Legendre et al., 2018), Pandoravirus macleodensis (Legendre et al., 2018), Pandoravirus  
141 neocaledonia (Legendre et al., 2018), Pandoravirus celtis (Legendre et al., 2019), Pandoravirus  
142 braziliensis and Pandoravirus pampulha (Aherfi et al., 2018).

143 **Transcription of candidate gene of cellulose synthase of Pandoravirus massiliensis and cellulose**  
144 **synthase of *Acanthamoeba castellanii***

145 RNA was extracted with the RNeasy mini kit (Cat No: 74104, Qiagen, France) at different time  
146 points of the Pandoravirus massiliensis cycle, from H0 (i.e. 45 min after the inoculation of amoeba  
147 cells by viral particles) until H12 post-infection (release of neo-synthesized virions). Total RNA was  
148 eluted in 50 µL of RNase-free water; 2.5 µl of RNaseOUT (Thermo Fisher Scientific, France) was  
149 added to the eluate to discard RNase. The DNase treatment was performed with TURBO DNase  
150 (Invitrogen, France; six cycles of 30 min incubation at 35°C). Two PCR systems targeting the DNA  
151 polymerase gene of Pandoravirus massiliensis (forward primer: 5'-ATGGCGCCCGTCTGGAAG;

152 reverse primer: 5'-GGCGCCAAAGTGGTGC GA) and the housekeeping gene of the RNA  
153 polymerase of *Acanthamoeba castellanii* (forward: 5'-ACGAACTTCCGAGAGATGCA; reverse: 5'-  
154 CACCTTGACCAGTCCCTTCT) were used to check for genomic DNA contamination and as  
155 positive controls for the reverse transcription. Primers targeting the candidate gene for the putative  
156 cellulose synthase of *Pandoravirus massiliensis* (forward: 5' TCCACTCGACATGCAATCTT;  
157 reverse: 5'- AAAACACAAACCCGCTCTGC) and those targeting the cellulose synthase genes  
158 (KC466026.1 and XM\_004335119.1) of *Acanthamoeba castellanii*  
159 (forward:5'GGGAGATCAACGACAACCTG; reverse: 5'-GTCCTCRGTCTGCGACTCGT ) were  
160 designed using Primer3 (Koressaar and Remm, 2007). RNeasy MinElute Cleanup Kit (Qiagen) was  
161 used to purify total RNA according to the manufacturer's recommendations. Total RNA was reverse-  
162 transcribed into cDNA by using the SuperScript VILO Synthesis Kit (Invitrogen, France). Then,  
163 qPCR was carried out on the cDNA with the LightCycler® 480 SYBR Green 1 Master reaction mix  
164 (Roche Diagnostics, Mannheim, Germany), following the manufacturer's temperature program with  
165 62°C as primer hybridization and elongation temperature. Each experiment was performed in  
166 triplicate.

## 167 **Results**

### 168 ***Pandoravirus massiliensis* ultrastructure**

169 The study by transmission electron microscopy (TEM) of the ultrastructure of negatively stained  
170 purified *Pandoravirus massiliensis* particles showed ovoid shaped virions with a mean maximal  
171 diameter of  $1,230 \pm 179$  nm and a mean minimal diameter of  $689 \pm 114$  nm (n=10), these dimensions  
172 reaching up to 1,510 nm x 860 nm (Figure 1.A). An ostiole with a concave shape could be observed  
173 at one apex of the particles (Figure 1.A) and thin fibrillar structures were present around the particles.  
174 Fixation with ruthenium red allowed good visualization of peripheral polysaccharides on ultrathin



175 sections. We observed for all particles, from periphery to inside (Figure 1.B,C): (i) peripheral sugars  
176 as depicted by ruthenium red aggregates, with electron-dense spikes originating from a thick layer of  
177 electron-dense aggregates ; (ii) an electron-lucent space; (iii) an electron-dense membrane; (iv) an  
178 homogeneous interspace; (v) a thick electron-dense layer made of several tubules; (vi) a smooth  
179 internal compartment, more dense at each apex. Particles were cut along different planes, thus  
180 showing their different orientations, and the ostioles could be observed cut transversally or  
181 perpendicularly (Figure 1.D). Structures originating from the thick inner tubular layer could be  
182 observed, such as thick tubules reaching the thin outer electron-dense membrane (Figure 1.E) or thin  
183 fibrils reaching the most peripheral ruthenium-red stained polysaccharides (Figure 1F).

184 Next, to get a more detailed ultrastructure, a three-dimensional (3D) electron tomography on 300 nm-  
185 thin sections of ruthenium-red fixed LR-White embedded Pandoravirus massiliensis particles was  
186 performed. Eight tomograms were reconstructed. A tilt-series acquired at x14,500 magnification  
187 ([Movie 1](#)) was used to reconstruct Tomogram 1, in which several particles can be observed ([Movie](#)  
188 [2](#)). These particles were ovoid in shape with a homogeneous internal compartment, or non-ovoid with  
189 an electron-lucent internal compartment, suggesting deteriorated particles. Tomogram 2 ([Movie 3](#)) is  
190 a zoom-in on a particle from Tomogram 1. Selected Z-planes from tomogram 2 (Figure 2) illustrate  
191 structures originating from the inner thick tubular layer: thick tubular structures with various  
192 diameters (black arrows in Figure 2) and thinner tubular/membranous structures of 2 nm-thick at the  
193 the ostiole (white arrows in Figure 2). Tomogram 3 is shown in [Movie 4](#). Selected Z-planes from  
194 tomogram 3 in Figure 3 show that the inner-most thick tubular layer is composed of two tubules with  
195 a diameter of 8 nm (Figure 3.B). Thin 2 nm-thick fibrils originate from the tubular layer, crossing the  
196 electron-dense outer membrane and projecting toward the peripheral sugars (Figure 3.C), or oriented  
197 toward the internal compartment on the opposite side of the ostiole (Figure 3D). Tomogram 4 ([Movie](#)  
198 [5 and Movie 6](#)) was chosen to illustrate the continuity between the two tubules from the inner-most

199 tubular layer. These tubules can form a U-shape with no ending at the ostiole (Figure 4.A). In  
200 addition, we found out that the two inner-most tubules can present a helicoidal arrangement. This  
201 finding is shown in tomogram 5 ([Movie 6](#)), which is a zoom-in sub-tomogram from tomogram 4. In  
202 Figure 4.B, the two tubules from tomogram 5 are arranged as a helix, with locations where the two  
203 tubules are distant and other locations where the two tubules are crossed. This helical structural  
204 arrangement of the inner-most thick tubular layer then became obvious when playing all tomograms  
205 acquired, and this organization could also be noticed when looking back at conventional ultra-thin  
206 sections without tomography. The two tubules were superposed forming a 10 nm-thick layer or  
207 alternatively distant of 30 nm. On average, this helical arrangement had a periodicity of 150 nm, from  
208 crossing points to the most distant location point of the tubules.

209 Subsequently, since the diameter and structure of inner-most tubules potentially forming helix  
210 resembled cellulose and chitin according to the literature, we hypothesized that that the inner-most  
211 layer of the Pandoravirus massiliensis particles was consisted of cellulose and/or chitin.

## 212 **Cellulose staining**

213 In order to check for cellulose content in Pandoravirus massiliensis particles, a calcofluor white  
214 staining of viral particles smears and confocal imaging were performed. Negative control consisting  
215 in unstained particles did not show any fluorescence under UV illumination (Figure 5.A, B).

216 Inversely, calcofluor-stained particles were fluorescent under the same illumination (Figure 5.C, D).

217 Single in-liquid Pandoravirus massiliensis particles were stained by calcofluor, as well as particles  
218 that remained in a few amoebae still present after purification (Figure 6.A). Zooming on individual  
219 particles showed that, on average, the fluorescence of the periphery of the particles seemed to be  
220 more intense than in the central region of the same particles (Figure 6.B, C).

221 **Degradation of the pandoravirus particles by the cellulase treatments and ultrastructure of**  
222 **cellulase-treated Pandoravirus massiliensis particles**

223 The mean number of viral particles per microscopic field observed after cellulase treatment at high  
224 concentrations (stock solution and 1:10 dilution) by confocal microscopy and assessed on 10  
225 microscopic fields by the ImageJ software decreased in comparison with the negative control  
226 composed of the same viral sample not submitted to the enzymatic treatment (Figures 7, 8). With a  
227 cellulase solution diluted at 1:10, the number of viral particles was slightly divided by two, and only  
228  $\approx 6\%$  of the virions remained intact after a treatment by the cellulase stock solution. Moreover,  
229 calcofluor staining on viral particles treated by cellulase did not show any fluorescence under UV  
230 illumination (Figure 9. A1). Besides, a treatment by 1:10 diluted cellulase solution showed a  
231 fluorescent matrix (Figure 9.B1) suggesting a degradation of a cellulosic part of the viral particles. It  
232 should be noted that this result was less obvious in the most diluted solution of the enzyme (1:100)  
233 (Figure 9.C1). Furthermore, the scanning microscopy of pandoravirus virions treated with cellulase at  
234 high concentration confirmed the progressive degradation of particles (Figures 9.A1 to D3). It also  
235 showed the partial digestion of pandoravirus particles treated with cellulase at 1:10 dilution, by  
236 forming a matrix (Figures 9.B2,B3).

237 As compared to control, untreated Pandoravirus massiliensis particles (Figure 10.A1-A5), a  
238 degradation of the virions by the cellulase solution was observed by transmission electron  
239 microscopy (Figure 10.B-D). Albeit this effect was not homogeneous between particles in all  
240 conditions, defective particles were observed with a dose-dependent effect of cellulase at the  
241 peripheral envelope and/or the internal compartment. Indeed, at 1/100 cellulase concentration,  
242 particles showed a defect of the envelope (Figure 10.B3-B5) with the presence of electron-luscent  
243 regions between the thin electron-dense membrane and the thick bundle of tubules described in  
244 Figure 1. Detachments from the different layers were also observed in most of the affected particles.

245 (Figure 10.B5). Accordingly, with 1/10 cellulase concentration treatment, particles exhibited  
246 electron-luscent regions at the level of the envelope as well as detachments of the different layers  
247 (Figure 10.C3-C5), and also defects in the internal compartment with empty spaces and vacuoles  
248 (Figure 10.C4,C5). This defect in the internal compartment was even more observable at stock  
249 concentration of cellulase (Figure 10.D2-D4), with ‘ghost-like’ particles presenting totally empty  
250 internal spaces and only a thin surrounding envelope (Figure 10.D5). We also noticed the presence of  
251 debris and/or of an amorphous matrix in the ultra-thin sections of cellulase-treated pandoravirus  
252 virions (Figure 10.B1,C1,D1), in a dose-dependent manner coherent with the amorphous matrix seen  
253 by light microscopy and scanning electron microscopy under the same conditions (Figure 10), which  
254 may correspond to the debris of cellulase-digested particles.

#### 255 **Cellulose synthase candidate gene in the Pandoravirus massiliensis gene content**

256 DELTA-BLAST analyses revealed a distant homology for the predicted gene 594 of Pandoravirus  
257 massiliensis with the cellulose synthase domain bcsA of different bacteria such as *Escherichia coli*,  
258 *Shigella* sp., *Salmonella enterica* for the 30 best hits. These homologies were barely significant with  
259 the 10 best hits, identity percentages in amino acids varying between 24.7% and 23.9%, query  
260 coverages between 24% and 25%, and e-values ranging between 2e-15 and 3e-15 (Supplementary  
261 File 1). For this ORF594, no homology with a cellulose synthase was found by BLAST analyses  
262 neither against the nr database, nor against the conserved domain database (CDD) (Marchler-Bauer et  
263 al., 2017). Orthologs of this ORF594 were found by BLASTp analyses in all the 9 other  
264 pandoraviruses, with e-values varying from 3.41e-11 to 0.006; but none of them harbored the same  
265 bcsA domain when searched for by DELTA-BLAST analysis or in the Conserved Domain Database.

#### 266 **Transcription of candidate gene of cellulose synthase of Pandoravirus massiliensis and cellulose** 267 **synthase of *Acanthamoeba castellanii***

268 All qPCR experiments performed on *P. massiliensis* DNA using primers targeting the cellulose  
269 synthase candidate gene (ORF594) were positive, whereas all those performed on *A. castellanii* Neff  
270 DNA using the same primers were negative, which confirmed the specificity of the PCR system.  
271 Conversely, qPCR targeting the cellulose synthase gene of *A. castellanii* was positive on the amoebal  
272 DNA and negative on the viral DNA, confirming the amoebal specificity of these primers. All qPCR  
273 tests performed on the purified RNA extract after DNase treatment before the reverse transcription  
274 step were negative, indicating efficient DNA degradation.

275 qRT-PCR targeting *P. massiliensis* ORF594 were positive on the viral cDNA for samples collected  
276 during the whole viral cycle, indicating that this gene was transcribed. qRT-PCR targeting *A.*  
277 *castellanii* cellulose synthase gene were positive on the cDNA obtained from uninfected amoebae  
278 and from amoebae infected by *P. massiliensis* during the whole replicative cycle (Figure 11). These  
279 latter results show that the cellulose synthase gene of *Acanthamoeba castellanii* is transcribed both in  
280 uninfected amoebae and in amoebae infected with Pandoravirus massiliensis.

## 281 **Discussion**

282 We have determined here, by studying the ultrastructure of Pandoravirus massiliensis virions by  
283 transmission electron microscopy after various treatments, that its viral integument, not previously  
284 characterized, was partially of a polysaccharide nature with a helical structure comparable to that of  
285 vegetable cellulose. Several markers of sugars (red rhutenium, calcofluor), the degradation of virions  
286 by cellulase and the use of appropriate negative controls clearly confirmed the cellulosic nature of the  
287 pandoravirus viral tegument. The cellulose is the most common biologic macromolecule,  
288 biosynthesized by vegetals, algae, some bacteria, and by some marine animals as Ascidiæ (Chen et  
289 al., 2016; Helenius et al., 2006; Nakashima et al., 2004). It is also a major component of the cyst of  
290 *Acanthamoeba*, the unique host of pandoraviruses demonstrated to date (Magistrado-Coxen et al.,

291 2019). It is composed of polymers of  $\beta$  (1,4) glucose subunits. Cellulosic chains are structured as  
292 microfibrils, which confer both resistance and plasticity to the vegetal walls, and also probably to the  
293 tegument of Pandoravirus massiliensis virions. The bioinformatic analyses of the Pandoravirus  
294 massiliensis genome possibly revealed a candidate gene (ORF594) for a cellulose synthase, which  
295 could be involved in the cellulose synthesis of the viral tegument. Indeed, a distant homology with  
296 the BcsA domain, which is one of the four catalytic subunits of the bacterial cellulose synthase was  
297 found (Wong et al., 1990). The domain bcsA polymerizes 5'-UDP-glucose to the cellulose polymer  
298 in formation (Zimmer, 2015). In the 9 other pandoraviruses, an ortholog for the ORF594 was found  
299 by BLASTp analysis. The experiments of qRT PCR revealed that this gene was transcribed during  
300 the viral cycle with an increased transcription 4, 6 and 8 hours post-infection, the time points  
301 matching with the formation of viral factories, which could reinforce this first hypothesis.

302 However, the similarity with the bcsA domain is very low and this domain was not found in none of  
303 the 9 other pandoraviruses. Besides, the length of this domain bcsA found in bacteria ranges  
304 approximately around 800 amino-acids in length. The ORF594 is slightly smaller with a predicted  
305 encoded protein of only 135 amino-acids in length. The 3 other subunits of the cellulose synthase  
306 were not found in the Pandoravirus massiliensis genome, neither by BLASTp nor by DELTA Blast  
307 analyses. Therefore, although this ORF594 is transcribed during the replicative cycle, the implication  
308 of the ORF594 in the synthesis of the cellulose is unlikely. One of the most amazing features of the  
309 pandoraviruses is the tremendous proportion of ORFans (genes without any homolog in the  
310 international sequence databases) and genes predicted to encode hypothetical proteins in their  
311 genome. These recently described viruses are so far to be exhaustively characterized. It has been  
312 shown that these hypothetical proteins are transcribed and translated (Aherfi et al., 2018; Legendre et  
313 al., 2018; Philippe et al., 2013; Scheid, 2016) suggesting that they have an efficient function for the  
314 virus. Among all these predicted genes, some of them could be implied in the synthesis of the

315 cellulose, i.e. other unidentified cellulose synthase subunits, through synthesis by new enzymes or by  
316 a new metabolic pathway, unknown to date.

317 We could alternatively hypothesize that the virus could use for the synthesis of its particles  
318 tegument, the gene of the cellulose synthase of *Acanthamoeba castellanii* (Clarke et al., 2013). In a  
319 previous work, it has been shown that when *Acanthamoeba* was infected with a mimivirus, the  
320 transcription of the amoeba fell dramatically and at 6 hours after infection, the transcription became  
321 undetectable (Legendre et al., 2010). We observed herein, that the host gene of cellulose synthase  
322 was transcribed during the all the replication cycle of Pandoravirus massiliensis, showing that the  
323 transcription of this amoebal gene is not impacted by the infection with Pandoravirus. Therefore, we  
324 can assume that the amoebal cellulose synthase could be diverted to the virus benefits, and could be  
325 involved in the synthesis of the cellulosic viral tegument. This gene was also found as transcribed,  
326 while *Acanthamoeba castellanii* were in the survival buffer, a buffer with the minimal components  
327 for the survival of amoebae, and thus leading to the amoebal encystment. At this time, the amoeba  
328 could start the synthesis of cellulose, a main component of the amoebal cyst.

329 In conclusion, we could determine herein the cellulosic nature of the tegument of Pandoravirus  
330 massiliensis. Although a distant similarity was found with the catalytic subunit bcsA of the bacterial  
331 cellulose synthase, with a predicted ORF of Pandoravirus massiliensis, this domain was not found in  
332 any other pandoravirus. These data suggest that the cellulose of the tegument of pandoraviruses could  
333 be probably the product of the host amoebal cellulose synthase. These results provide new data  
334 information about this important virus and contributes to the understanding of the biology of these  
335 complex viruses and their definition and classification in the virosphere.

336 **Authors contributions**

337 DBB and JPB did the experiments and wrote the paper. FDP and FG did the experiments. PC wrote  
338 the paper. SA supervised the experiments and wrote the paper. BLS conceived the project, supervised  
339 the experiments and wrote the paper.

340

341 **Funding**

342 This work was supported by the French Government under the “Investments for the Future” program  
343 managed by the National Agency for Research (ANR), Méditerranée-Infection 10-IAHU-03 and was  
344 also supported by Région Provence-Alpes-Côte d’Azur and European funding FEDER PRIMMI  
345 (Fonds Européen de Développement Régional - Plateformes de Recherche et d’Innovation Mutuali  
346 sées Méditerranée Infection).

347

348 **Conflict of Interest**

349 The authors declare that the research was conducted in the absence of any commercial or financial  
350 relationships that could be construed as a potential conflict of interest.

351

352 The movies for this article can be found online at : [https://www.mediterranee-infection.com/aces-  
353 ressources/donnees-pour-articles/pandoravirus-massiliensis-tomograms/](https://www.mediterranee-infection.com/ressources/donnees-pour-articles/pandoravirus-massiliensis-tomograms/)

354



## 355 Reference

- 356 Aherfi, S., Andreani, J., Baptiste, E., Oumessoum, A., Dornas, F.P., Andrade, A.C.D.S.P., Chabriere, E., Abrahao, J.,  
357 Levasseur, A., Raoult, D., et al. (2018). A Large Open Pangenome and a Small Core Genome for Giant Pandoraviruses.  
358 *Front. Microbiol.* *9*, 1486. doi:10.3389/fmicb.2018.01486.
- 359 Andreani, J., Aherfi, S., Bou Khalil, J.Y., Di Pinto, F., Bitam, I., Raoult, D., Colson, P., and La Scola, B. (2016).  
360 Cedratvirus, a Double-Cork Structured Giant Virus, is a Distant Relative of Pithoviruses. *Viruses* *8*.  
361 doi:10.3390/v8110300.
- 362 Andreani, J., Khalil, J.Y.B., Baptiste, E., Hasni, I., Michelle, C., Raoult, D., Levasseur, A., and La Scola, B. (2018).  
363 Orpheovirus IHUMI-LCC2: A New Virus among the Giant Viruses. *Front. Microbiol.* *8*. doi:10.3389/fmicb.2017.02643.
- 364 Chen, Y.W., Lee, H.V., Juan, J.C., and Phang, S.-M. (2016). Production of new cellulose nanomaterial from red algae  
365 marine biomass *Gelidium elegans*. *Carbohydr. Polym.* *151*, 1210–1219. doi:10.1016/j.carbpol.2016.06.083.
- 366 Clarke, M., Lohan, A.J., Liu, B., Lagkouvardos, I., Roy, S., Zafar, N., Bertelli, C., Schilde, C., Kianianmomeni, A.,  
367 Bürglin, T.R., et al. (2013). Genome of *Acanthamoeba castellanii* highlights extensive lateral gene transfer and early  
368 evolution of tyrosine kinase signaling. *Genome Biol.* *14*, R11. doi:10.1186/gb-2013-14-2-r11.
- 369 Colson, P., De Lamballerie, X., Yutin, N., Asgari, S., Bigot, Y., Bideshi, D.K., Cheng, X.-W., Federici, B.A., Van Etten,  
370 J.L., Koonin, E.V., et al. (2013). “Megavirales”, a proposed new order for eukaryotic nucleocytoplasmic large DNA  
371 viruses. *Arch. Virol.* *158*, 2517–2521. doi:10.1007/s00705-013-1768-6.
- 372 Helenius, G., Bäckdahl, H., Bodin, A., Nannmark, U., Gatenholm, P., and Risberg, B. (2006). In vivo biocompatibility of  
373 bacterial cellulose. *J. Biomed. Mater. Res. A* *76A*, 431–438. doi:10.1002/jbm.a.30570.
- 374 Koressaar, T., and Remm, M. (2007). Enhancements and modifications of primer design program Primer3. *Bioinforma.*  
375 *Oxf. Engl.* *23*, 1289–1291. doi:10.1093/bioinformatics/btm091.
- 376 Kremer, J.R., Mastrorarde, D.N., and McIntosh, J.R. (1996). Computer visualization of three-dimensional image data  
377 using IMOD. *J. Struct. Biol.* *116*, 71–76. doi:10.1006/jsbi.1996.0013.
- 378 La Scola, B., Audic, S., Robert, C., Jungang, L., de Lamballerie, X., Drancourt, M., Birtles, R., Claverie, J.-M., and  
379 Raoult, D. (2003). A giant virus in amoebae. *Science* *299*, 2033. doi:10.1126/science.1081867.
- 380 Legendre, M., Audic, S., Poirot, O., Hingamp, P., Seltzer, V., Byrne, D., Lartigue, A., Lescot, M., Bernadac, A., Poulain,  
381 J., et al. (2010). mRNA deep sequencing reveals 75 new genes and a complex transcriptional landscape in Mimivirus.  
382 *Genome Res.* *20*, 664–674. doi:10.1038/s41467-018-04698-4.
- 383 Legendre, M., Bartoli, J., Shmakova, L., Jeudy, S., Labadie, K., Adrait, A., Lescot, M., Poirot, O., Bertaux, L., Bruley,  
384 C., et al. (2014). Thirty-thousand-year-old distant relative of giant icosahedral DNA viruses with a pandoravirus  
385 morphology. *Proc. Natl. Acad. Sci. U. S. A.* *111*, 4274–4279. doi:10.1101/gr.102582.109.
- 386 Legendre, M., Fabre, E., Poirot, O., Jeudy, S., Lartigue, A., Alempic, J.-M., Beucher, L., Philippe, N., Bertaux, L.,  
387 Christo-Foroux, E., et al. (2018). Diversity and evolution of the emerging Pandoraviridae family. *Nat. Commun.* *9*, 2285.  
388 doi:10.3389/fmicb.2019.00430.
- 389 Legendre, M., Alempic, J.-M., Philippe, N., Lartigue, A., Jeudy, S., Poirot, O., Ta, N.T., Nin, S., Couté, Y., Abergel, C.,  
390 et al. (2019). Pandoravirus Celtis Illustrates the Microevolution Processes at Work in the Giant Pandoraviridae Genomes.  
391 *Front. Microbiol.* *10*, 430. doi:10.1073/pnas.1320670111.
- 392 Magistrado-Coxen, P., Aqeel, Y., Lopez, A., Haserick, J.R., Urbanowicz, B.R., Costello, C.E., and Samuelson, J. (2019).  
393 The most abundant cyst wall proteins of *Acanthamoeba castellanii* are lectins that bind cellulose and localize to distinct  
394 structures in developing and mature cyst walls. *PLoS Negl. Trop. Dis.* *13*, e0007352.

- 395 Marchler-Bauer, A., Bo, Y., Han, L., He, J., Lanczycki, C.J., Lu, S., Chitsaz, F., Derbyshire, M.K., Geer, R.C., Gonzales,  
396 N.R., et al. (2017). CDD/SPARCLE: functional classification of proteins via subfamily domain architectures. *Nucleic*  
397 *Acids Res.* *45*, D200–D203. doi:10.1371/journal.pntd.0007352.
- 398 Nakashima, K., Yamada, L., Satou, Y., Azuma, J., and Satoh, N. (2004). The evolutionary origin of animal cellulose  
399 synthase. *Dev. Genes Evol.* *214*, 81–88. doi:10.1007/s00427-003-0379-8.
- 400 Pereira Andrade, A.C.D.S., Victor de Miranda Boratto, P., Rodrigues, R.A.L., Bastos, T.M., Azevedo, B.L., Dornas, F.P.,  
401 Oliveira, D.B., Drumond, B.P., Kroon, E.G., and Abrahão, J.S. (2019). New Isolates of Pandoraviruses: Contribution to  
402 the Study of Replication Cycle Steps. *J. Virol.* *93*. doi:10.1128/JVI.01942-18.
- 403 Philippe, N., Legendre, M., Doutre, G., Couté, Y., Poirot, O., Lescot, M., Arslan, D., Seltzer, V., Bertaux, L., Bruley, C.,  
404 et al. (2013). Pandoraviruses: amoeba viruses with genomes up to 2.5 Mb reaching that of parasitic eukaryotes. *Science*  
405 *341*, 281–286. doi:10.1126/science.1239181.
- 406 Reynolds, E.S. (1963). The use of lead citrate at high pH as an electron-opaque stain in electron microscopy. *J. Cell Biol.*  
407 *17*, 208–212. doi:10.1083/jcb.17.1.208.
- 408 Scheid, P. (2016). A strange endocytobiont revealed as largest virus. *Curr. Opin. Microbiol.* *31*, 58–62.  
409 doi:10.1016/j.mib.2016.02.005.
- 410 Scheid, P., Balczun, C., and Schaub, G.A. (2014). Some secrets are revealed: parasitic keratitis amoebae as vectors of the  
411 scarcely described pandoraviruses to humans. *Parasitol. Res.* *113*, 3759–3764. doi:10.1007/s00436-014-4041-3.
- 412 Schneider, C.A., Rasband, W.S., and Eliceiri, K.W. (2012). NIH Image to ImageJ: 25 years of image analysis. *Nat.*  
413 *Methods* *9*, 671–675. doi:10.1038/nmeth.2089.
- 414 Tamura, K., Stecher, G., Peterson, D., Filipski, A., and Kumar, S. (2013). MEGA6: Molecular Evolutionary Genetics  
415 Analysis version 6.0. *Mol. Biol. Evol.* *30*, 2725–2729. doi:10.1093/molbev/mst197.
- 416 Wong, H.C., Fear, A.L., Calhoon, R.D., Eichinger, G.H., Mayer, R., Amikam, D., Benziman, M., Gelfand, D.H., Meade,  
417 J.H., and Emerick, A.W. (1990). Genetic organization of the cellulose synthase operon in *Acetobacter xylinum*. *Proc.*  
418 *Natl. Acad. Sci.* *87*, 8130–8134. doi:10.1073/pnas.87.20.8130.
- 419 Zimmer, J. (2015). A Molecular Description of Cellulose Biosynthesis. *Biophys. J.* *108*, 499a.  
420 doi:10.1016/j.bpj.2014.11.2734.
- 421
- 422
- 423
- 424

425 **FIGURES :**

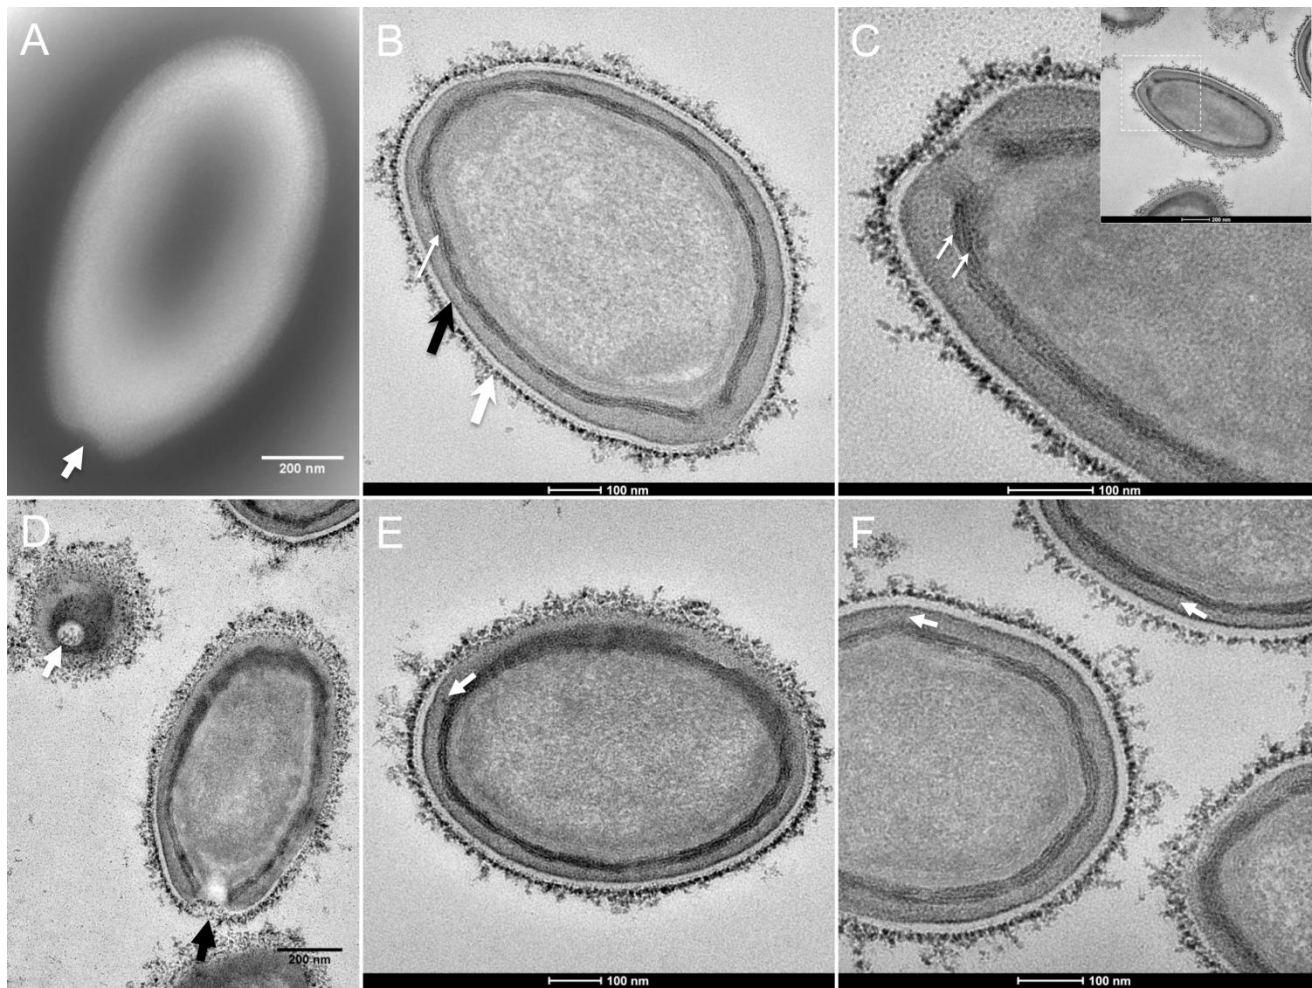

426

427 **Figure 1. Transmission electron microscopy of Pandoravirus massiliensis.**

428 A. Negative staining of a Pandoravirus massiliensis particle: the ostiole (arrow) is located at the apex  
429 of the particle. Peripheral thin fibers can be observed enwrapping the particle. B. Ultrathin section  
430 showing i) the most-peripheral sugars depicted by ruthenium red aggregates (thick white arrow) ; ii) a  
431 thin electron-dense membrane (thick black arrow) and more centrally iii) a thick bundle of tubules  
432 (thin white arrow). C. Two thick tubules compose the inner-most thick layer. D. Two particles with  
433 ostioles cut transversally or perpendicularly. E. The inner-most thick tubules with thick protrusions  
434 toward the outer thin electron-dense membrane. F. Thin fibers projecting from the inner-most thick

435 tubules, crossing the outer electron-dense membrane and reaching the peripheral ruthenium-red  
436 stained sugars

437

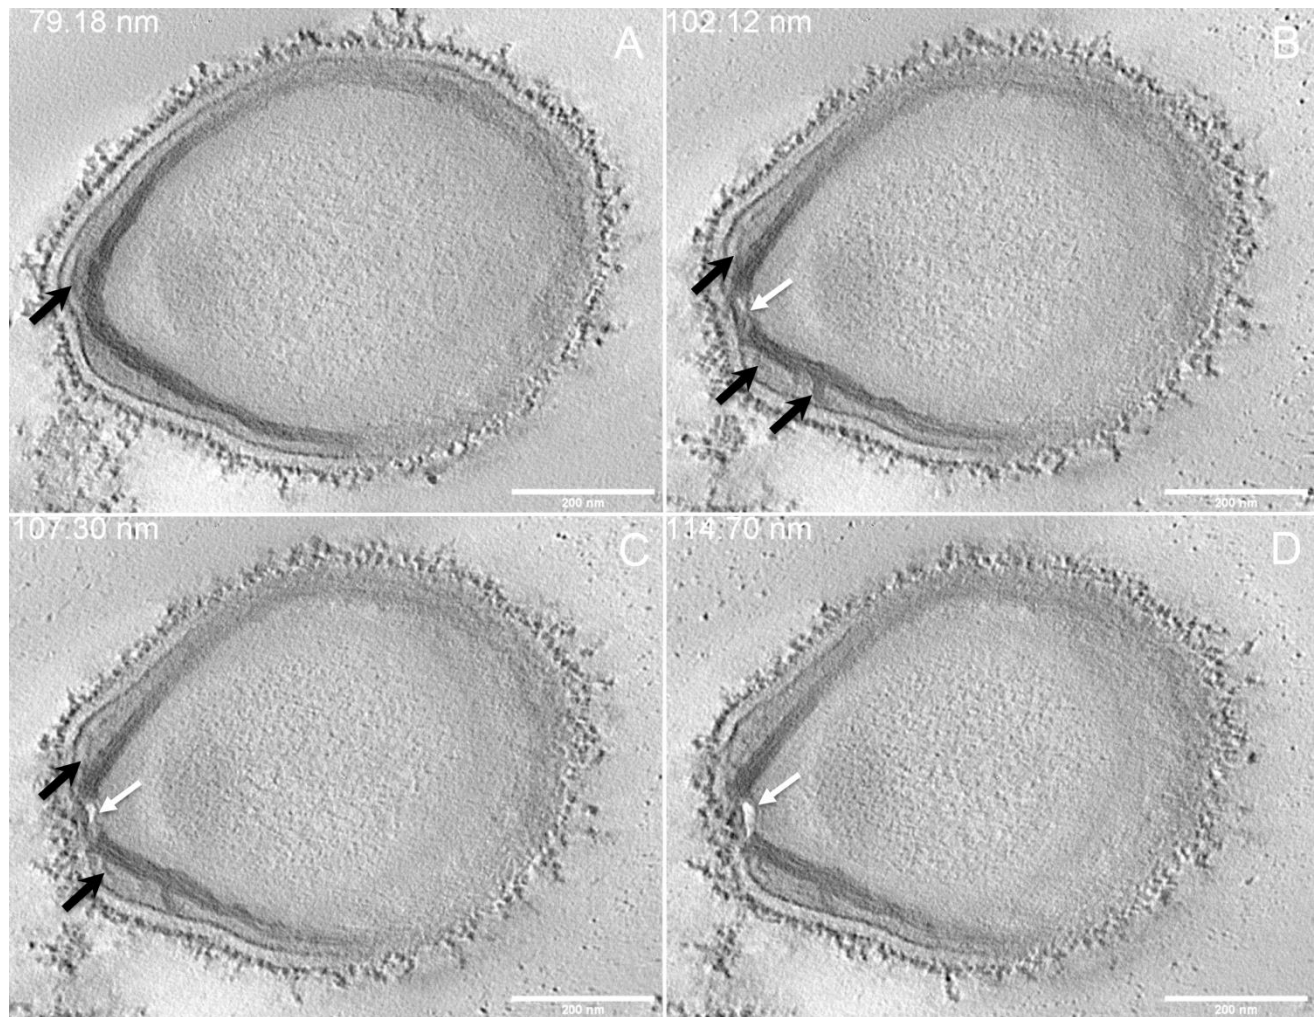

438

439 **Figure 2. Electron tomography of Pandoravirus massiliensis particle from Movie3.**

440 A-D. Single planes in the tomogram from Movie3 showing thick tubules protruding toward the  
441 periphery and the outer electron-dense membrane (black arrows); a thin tubule/membrane (white  
442 arrow) connects the thick tubules layers located on each side of the ostiole.

443

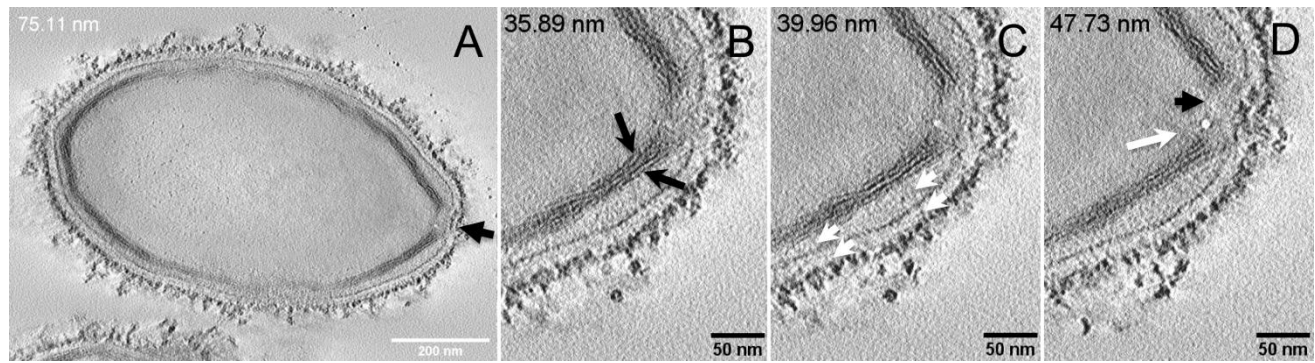

444

445 **Figure 3. Electron tomography of Pandoravirus massiliensis particle from Movie4.**

446 A. Single plane in the tomogram from Movie4 showing a whole Pandoravirus particle and its ostiole  
447 located at one apex (arrow). B. The inner-most layer is composed of two thick tubules well separated  
448 as seen here or contacting each other. C-D. Thin fibers (white arrows) originating from the inner-  
449 most tubular thick layer projecting toward the peripheral sugars (white arrows, C), toward the inner  
450 core of the particle (white arrow, D) or at the level of the ostiole (black arrow, D).

451

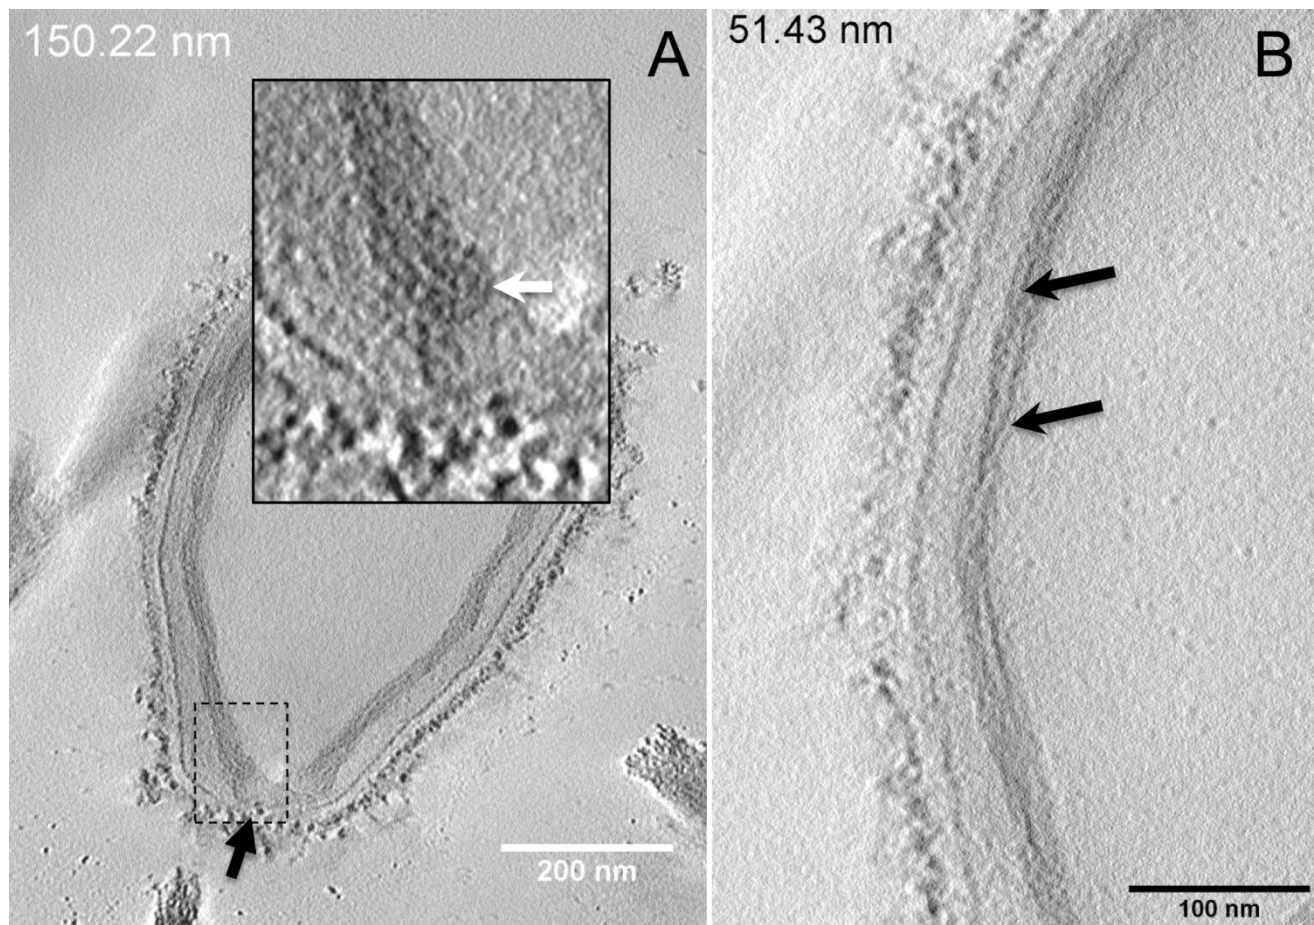

452

453 **Figure 4. Electron tomography of Pandoravirus massiliensis particles from Movies 5 and 6.**

454 A. Single plane in the tomogram from Movie5 showing a Pandoravirus particle with its ostiole (black  
455 arrow). The magnified boxed region depicts a U-shaped thick tubule from the inner-most layer. B.  
456 Single plane in Movie6 from the zoomed-in tomogram from Movie5 showing the helical structural  
457 arrangement of the two thick tubules (black arrows) composing the inner-most layer of Pandoravirus  
458 particles.

459

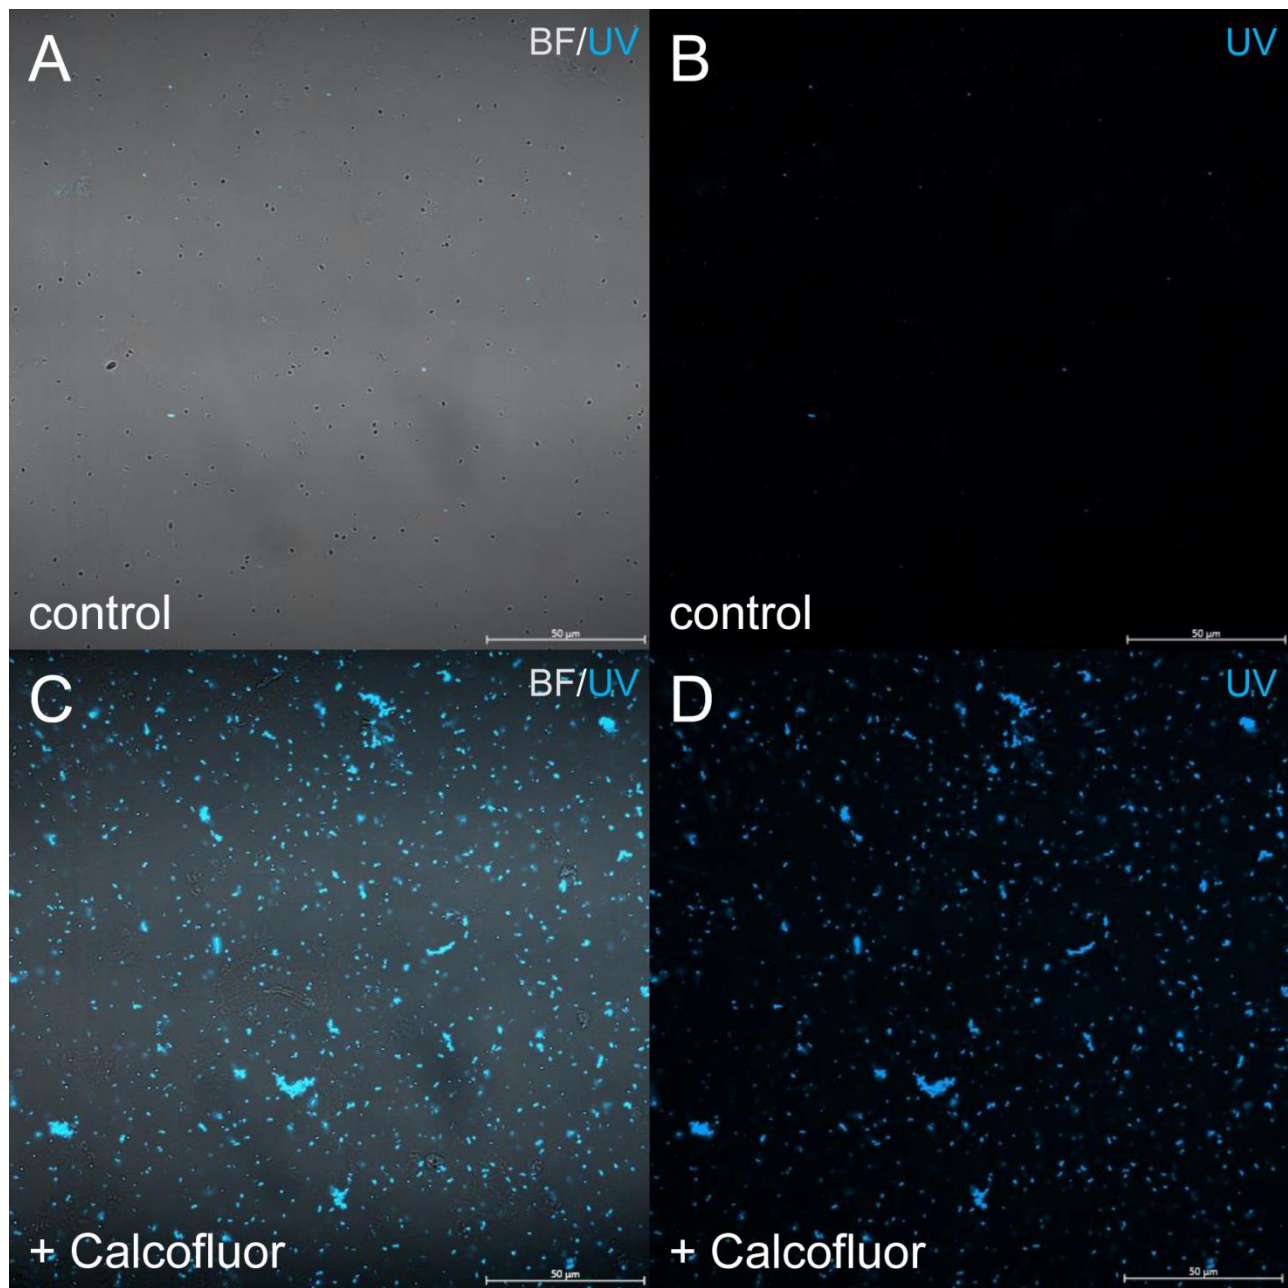

460

461 **Figure 5. Confocal imaging of Calcofluor staining of Pandoravirus massiliensis.**

462 A,B. Control Pandoravirus particles. C,D. Calcofluor-stained Pandoravirus particles.

463

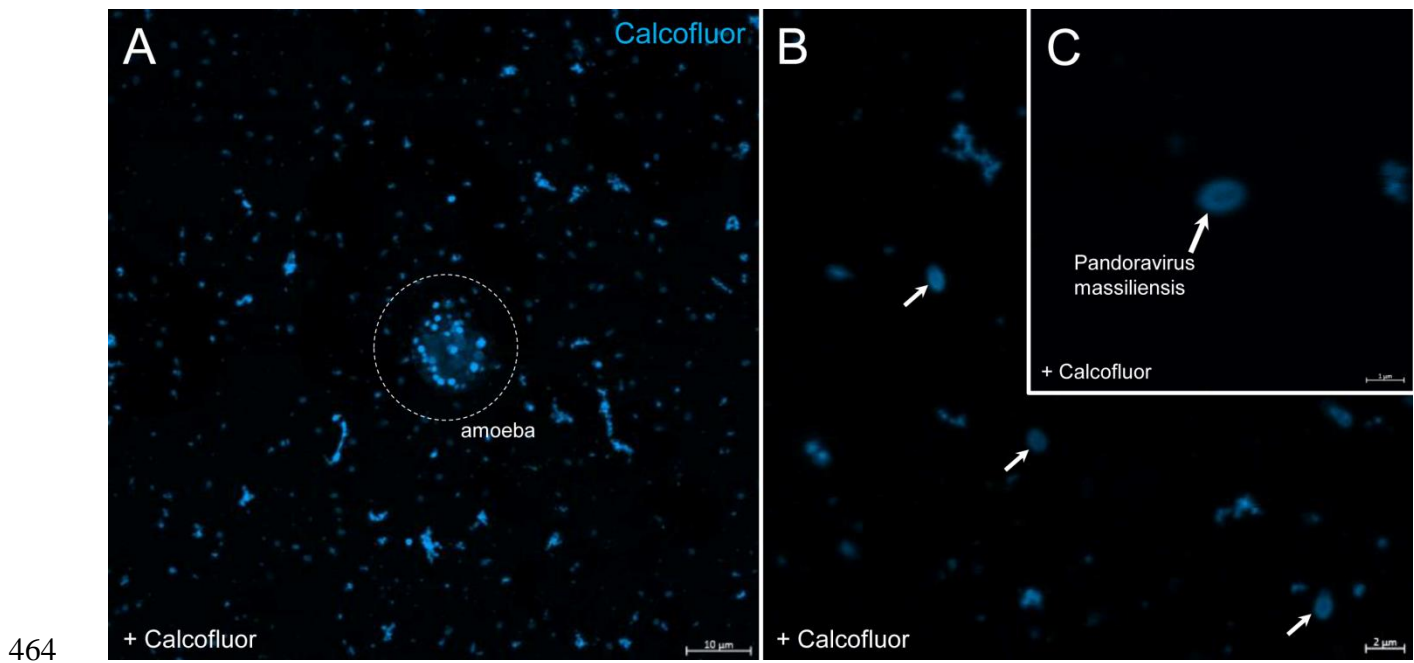

464

465 **Figure 6. Confocal imaging of Calcofluor staining of Pandoravirus massiliensis.**

466 A. Pandoravirus-infected amoeba and single Pandoravirus particles stained with Calcofluor white.

467 B,C. Calcofluor-stained Pandoravirus particles showing an intense peripheral calcofluor signal and a

468 less-stained central region.

469

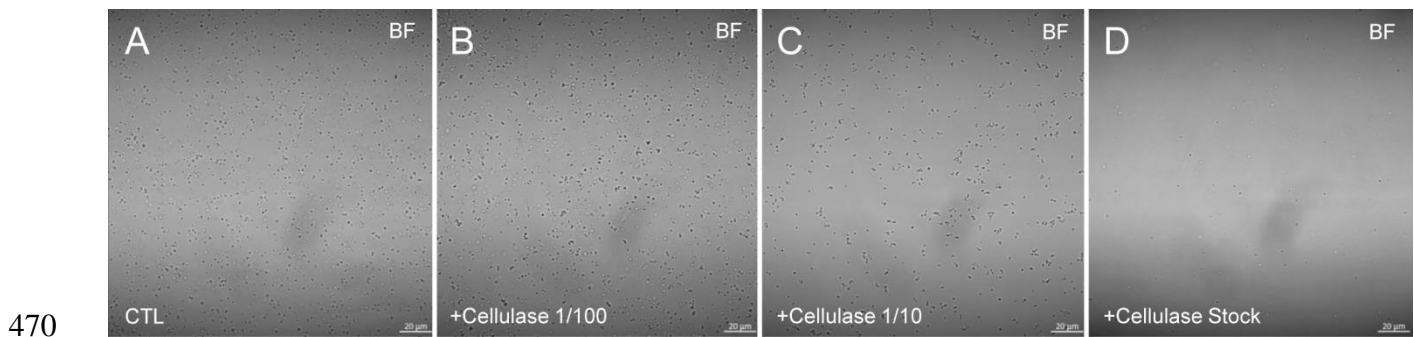

470

471 **Figure 7. Confocal imaging of cellulase-treated Pandoravirus massiliensis.**

472 A. Control condition with untreated Pandoravirus massiliensis particles. B-E: cellulase-treated

473 Pandoravirus massiliensis particles.



474

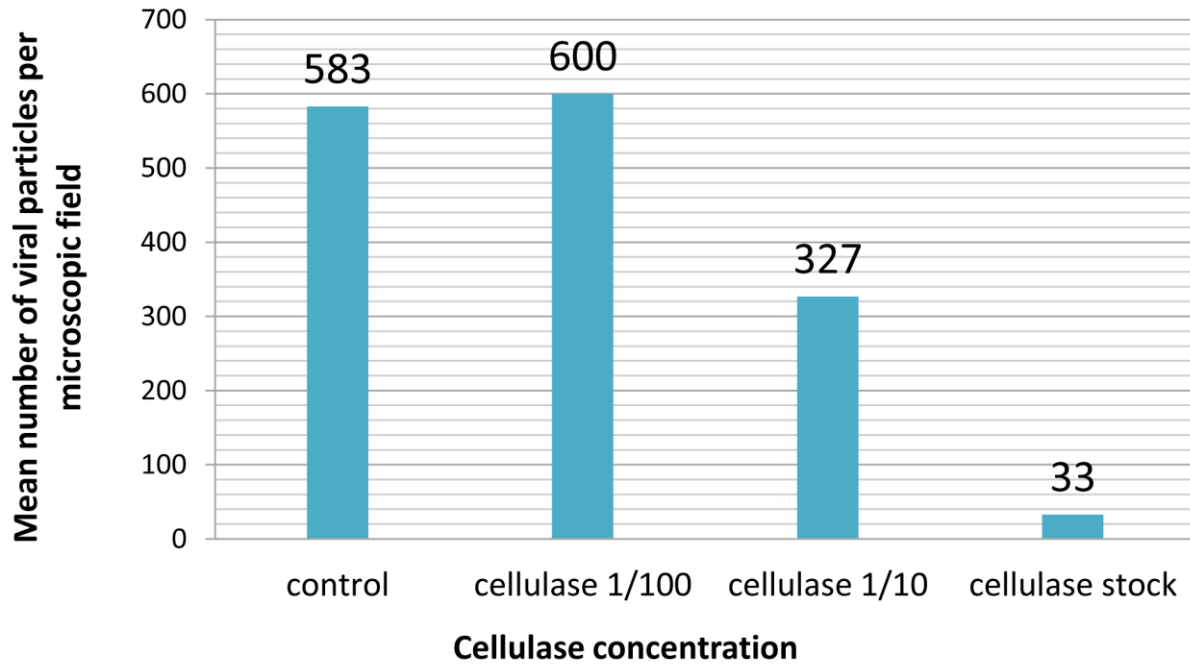

475  
476

477 **Figure 8** : Estimation of the mean number of particles of Pandoravirus massiliensis per microscopic  
478 field of observation after cellulase treatment, assessed by the imageJ software.

479

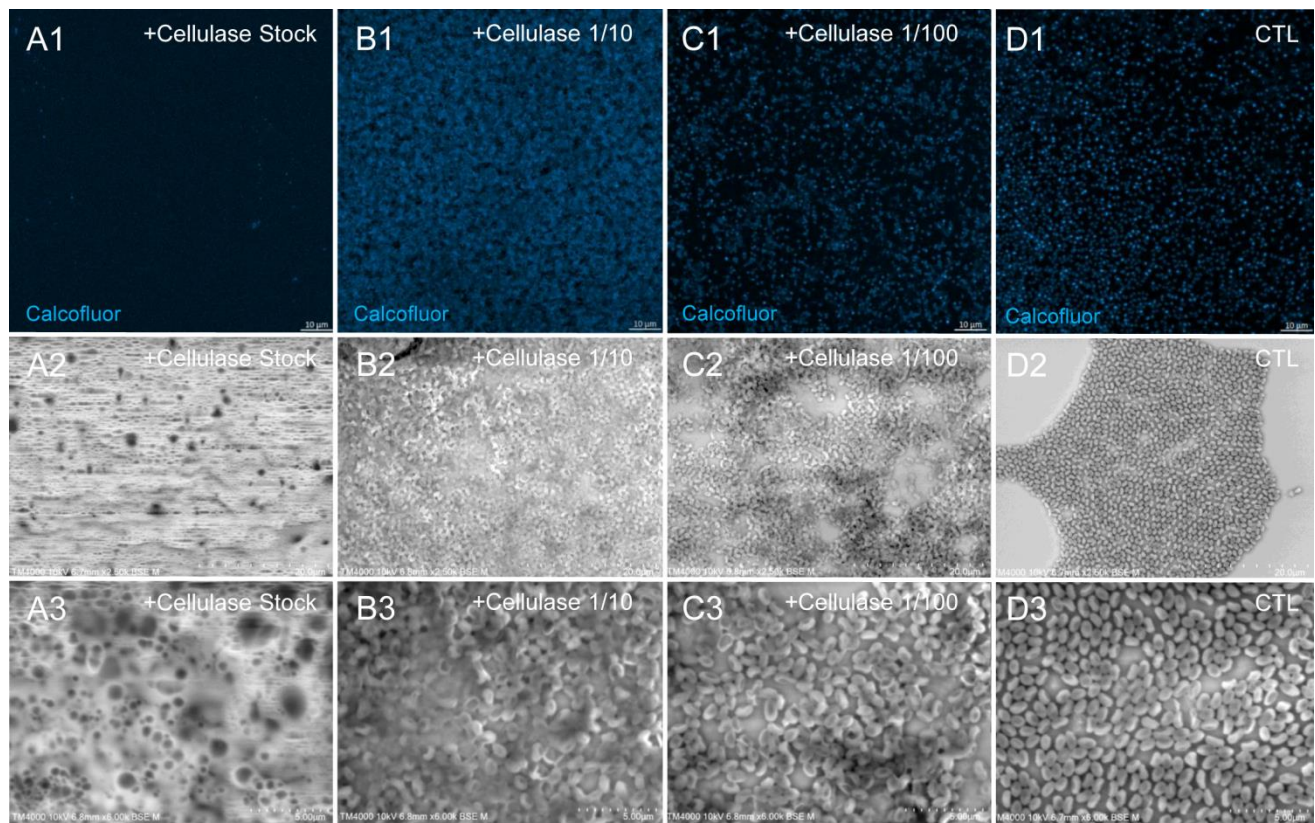

480

481 **Figure 9. Confocal imaging of Calcofluor-stained cellulase-treated Pandoravirus massiliensis**  
482 **virions and scanning microscopy of cellulose treated Pandoravirus massiliensis.**

483 A1-C1: cellulase-treated Pandoravirus massiliensis particles stained with Calcofluor-white.D1  
484 Control condition with untreated Pandoravirus massiliensis particles stained with Calcofluor-white.

485 A(2-3) B(2-3)-C(2-3): cellulase-treated Pandoravirus massiliensis particles.D2.D3 Control condition  
486 with untreated Pandoravirus massiliensis .. imaged with scanning microscopy on two magnification.

487

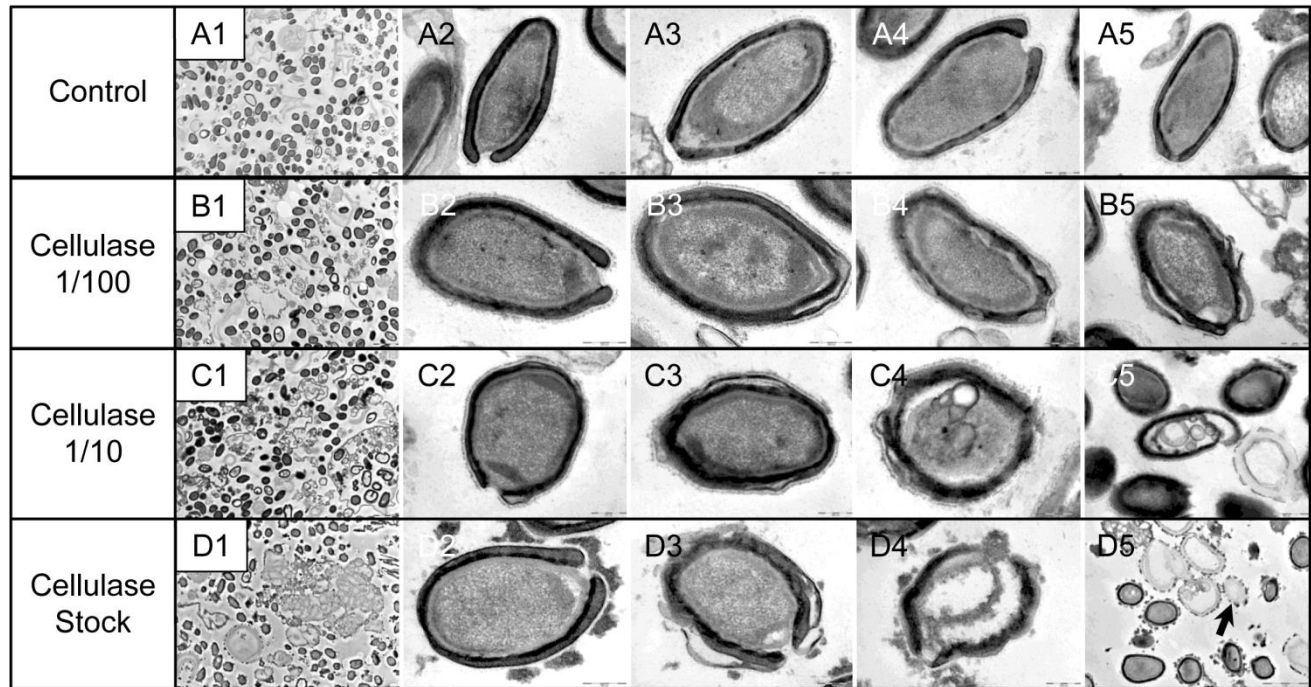

488

489 **Figure 10. Scanning microscopy of cellulase- treated Pandoravirus massiliensis particles.**

490 A1-A4 : Control condition with untreated Pandoravirus massiliensis particles .B-D Cellulase-treated  
491 Pandoravirus massiliensis particles imaged in different stages of digestion 1-4 from least to the most  
492 digested B.C.D (1): intact particles. B.C.D (2): the beginning of digestion. B.C.D(3): in the middle of  
493 digestion. B.C.D (4): at the end of the enzymatic digestion.

494

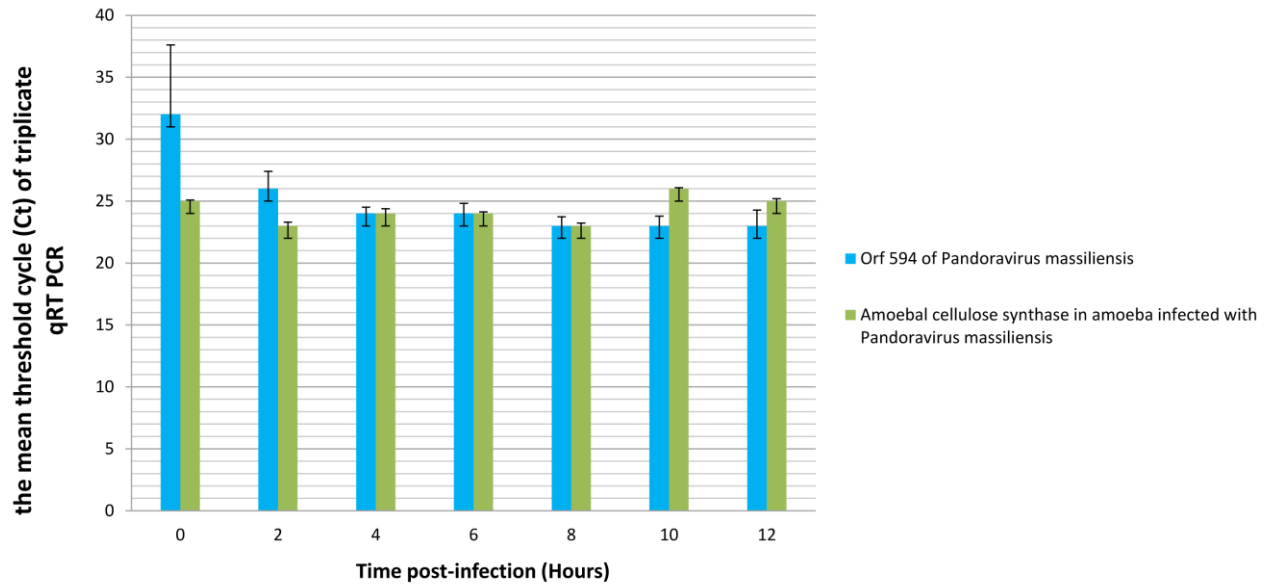

495

496 **Figure 11.** Representation of the mean threshold cycle (Ct) of triplicate qRT PCR on the RNA of  
497 Pandoravirus massiliensis by targeting the predicted gene of the cellulose synthase (ORF594) and on  
498 RNA of *Acanthamoeba castellanii* infected with Pandoravirus massiliensis by targeting the amoebal  
499 gene of the cellulose synthase, according to the time post-infection from 0 to 12 hours post-  
500 infection).
